# 1 Spatial architecture of CD8<sup>+</sup> T cells and DC subsets is critical for the response to 2 immune checkpoint inhibitors in melanoma

3 Elisa Gobbin<sup>\*1,5</sup>, Margaux Hubert<sup>\*1</sup>, Anne-Claire Doffin<sup>1,3</sup>, Anais Eberhardt<sup>1,6</sup>, Leo Hermet<sup>1</sup>, Danlin Li<sup>1</sup>,  
4 Pierre Duplouye<sup>1</sup>, Sarah Barrin<sup>1,2</sup>, Justine Berthet<sup>1,2</sup>, Valentin Benboubker<sup>1</sup>, Maxime Grimont<sup>1</sup>, Candice  
5 Sakref<sup>1,4</sup>, Jimmy Perrot<sup>6</sup>, Garance Tondeur<sup>6</sup>, Olivier Harou<sup>6</sup>, Jonathan Lopez<sup>6</sup>, Bertrand Dubois<sup>1,2</sup>,  
6 Stephane Dalle<sup>1,6</sup>, Christophe Caux<sup>1,2,3,4</sup>, Julie Caramel<sup>1,5</sup> and Jenny Valladeau-Guilemond<sup>1,3,4,5</sup>

7  
8 <sup>1</sup> Univ Lyon, Université Claude Bernard Lyon 1, INSERM U1052, CNRS 5286, Centre Léon Bérard, Centre de Recherche en  
9 Cancérologie de Lyon, Lyon, France

10 <sup>2</sup> Laboratoire d'Immunothérapie des Cancers de Lyon (LICL), Lyon, France

11 <sup>3</sup> Centre Léon Bérard, Lyon, France

12 <sup>4</sup> LabEx DEVweCAN, Lyon, France

13 <sup>5</sup> Institut Curie, Oncology Department, Paris, France

14 <sup>6</sup> Centre Hospitalier Lyon Sud, Hospices Civils de Lyon, Pierre Bénite, France

15 \* Authors contributed equally

16 <sup>5</sup> Co-senior authors

17 **Correspondence to:** [jenny.valladeau-guilemond@lyon.unicancer.fr](mailto:jenny.valladeau-guilemond@lyon.unicancer.fr)

18

## 19 Abstract

20 Background: Dendritic cells (DCs) are promising targets for cancer immunotherapies owing to their  
21 central role in the initiation and the control of immune responses. Their functions encompass a wide  
22 range of mechanisms mediated by different DC subsets. Several studies have identified human tumor-  
23 associated DC (TA-DC) populations through limited marker-based technologies, such as  
24 immunostaining or flow cytometry. However, tumor infiltration, spatial organization and specific  
25 functions in response to immunotherapy of each DC subset remain to be defined.

26 Methods: Here, we implemented a multiplexed immunofluorescence analysis pipeline coupled with  
27 bio-informatic analyses to decipher the tumor DC landscape and its spatial organization within  
28 melanoma patients' lesions, and its association with patients' response to immune checkpoint  
29 inhibitors (ICI). For this aim, we analyze a cohort of 41 advanced melanoma patients treated with anti-  
30 PD1 alone or associated with anti-CTLA4. Distance and cell network analyses were performed to gain  
31 further insight into the spatial organization of tumor-associated DCs. A Digital Spatial Profiling analysis  
32 further characterized ecosystem of tumor-infiltrating DCs.

33 Results: Plasmacytoid DCs (pDCs) were the most abundant DC population, followed by conventional  
34 cDC1 and mature DCs, present in equal proportions. In contrast to CD8<sup>+</sup> T cell frequency, and despite  
35 varying densities, all DC subsets were associated with a favorable response to ICI. Distance and cell  
36 network analyses demonstrated that tumor-infiltrating DCs were largely organized in dense areas with  
37 high homotypic connections, except for cDC1 that exhibited a more scattered distribution. We  
38 identified four patterns of ecosystems with distinct preferential interactions between DC subsets.  
39 Significantly, the proximity and interactions between CD8<sup>+</sup> T cells and cDC1 were positively associated  
40 with patients' response to ICI.

41 Conclusions: Our study unravels the complex spatial organization of DC subsets and their interactions  
42 in melanoma patient lesions, shedding light on their pivotal role in shaping the response to ICI. Our  
43 discoveries regarding the spatial arrangement of cDC1, especially with CD8<sup>+</sup> T cells, provide valuable  
44 clues for improving immunotherapeutic strategies in melanoma patients.

45

46

47

### 48 What is already known on this topic

49 Dendritic cells (DCs) are promising targets for cancer immunotherapies owing to their central  
role in the initiation and the control of immune responses. Although conventional type 1 dendritic cells

50 (cDC1) were proposed to contribute to immunotherapy response, their precise functions and  
51 interactions with other immune populations in human cancers are largely unknown.

52 **What this study adds:**

53 This study provides a precise characterization of the spatial distribution and organization of tumor-  
54 infiltrating DCs in a large cohort of advanced melanoma patients, and in correlation with response to  
55 immunotherapy. While DCs are organized in dense areas with high homotypic connections, cDC1  
56 exhibit a more scattered distribution and form heterotypic aggregates with other DC subsets. More  
57 importantly, a close connection between cDC1 and CD8 T cell is uniquely correlated with the patients'  
58 response to immunotherapy.

59 **How this study might affect research, practice or policy:** This study improves our understanding of  
60 CD8-DC spatial organization within the tumor microenvironment and will have a broad spectrum of  
61 implications in the design of anti-tumor immune-activating compounds and the design of biomarkers  
62 of response to immunotherapy for melanoma patients.

63  
64 **Introduction**

65 The incidence of cutaneous melanoma has steadily increased over the last decades and its mortality  
66 rate is the highest for skin cancers, with a 5-year survival rate of 29.8% in metastatic patients.  
67 Immunotherapy has radically shifted the treatment strategy for melanoma patients, with anti-PD-1  
68 monotherapy or its combination with anti-CTLA4 as first-line treatment for stage IV metastatic  
69 patients, regardless of BRAF mutational status (1). However, the number of patients displaying durable  
70 response remains low due to primary or acquired resistance to immune checkpoint inhibitors (ICI) (2).  
71 The tumor immune microenvironment (TIME) plays a key role in tumor immune surveillance and  
72 immune evasion, thus contributing to the efficacy of immunotherapy (3). Although dendritic cells (DCs)  
73 represent a very small proportion of leucocytes, they play a central role in the immune response  
74 against cancer. As antigen (Ag) presenting cells (APCs), they have a unique capacity to prime naïve T  
75 cells, being able to link innate and adaptive immunity (4,5). The distinction between plasmacytoid  
76 (pDCs) and myeloid/conventional (cDCs) lineages is widely accepted and is conserved in blood and  
77 tissues (6,7). pDCs are characterized with the specific surface markers CD123 and BDCA2. In cancer,  
78 pDCs may have a dual role, as they can activate the anti-tumor response in an innate or adaptive  
79 manner (8,9). Still, their IFN-I production can be impaired by soluble factors such as TGF- $\beta$  and TNF- $\alpha$   
80 produced by the tumor microenvironment, thus driving regulatory T cells (Tregs) expansion (10). Type  
81 1 conventional dendritic cells (cDC1) are characterized by the unique expression of CLEC9A and XCR1,  
82 respectively involved in endocytosis of necrotic material and in the cross-talk with T and natural killer  
83 (NK) cells (11–13). cDC1 are also particularly effective in Ag cross-presentation (11,14,15). cDC2 is a  
84 more heterogenous population able to induce Th1 but also Th2 and Th17 immune responses (16).  
85 Initially classified as DC due to their migratory and APC capacity, Langerhans cells (LCs) rather belong  
86 to the macrophage family due to their ontogeny although they share most surface markers with cDC2.  
87 Their localization is restricted to stratified epithelia, they express high levels of CD207, CD1a and  
88 EpCAM and have dichotomic roles from tolerance to Th2 polarization (17). Finally, mature DCs  
89 expressing high levels of activation markers such as DC-LAMP and CCR7, are well-conserved across  
90 cancer tissues (18), and can engage in crosstalk with T lymphocytes and NK cells through IL-12 and IFN-  
91  $\gamma$  (19,20).

92 Some studies have investigated the prognostic impact of DC subsets across different tumor types  
93 including melanoma. While conflicting results were reported for pDCs and cDC2 (depending on the  
94 detection method e.g. flow cytometry *versus* signatures from RNA-seq)(21), the association between  
95 cDC1 and a favorable prognosis is not debated, as evidenced by our team and others (22–25). A strong

96 infiltration of mature DCs was reported in association with improved survival and reduced metastatic  
97 spread in melanoma patients (26). However, little is known about the relative frequency? and spatial  
98 distribution of DC subsets *in situ* in tumors and their predictive value for patient survival and/or  
99 response to immunotherapy. Indeed, few spatially-resolved studies have reported DC subset  
100 infiltration in patients, and most of these analyzed a limited portion of tumor sample (e.g. often TMA),  
101 thus overlooking important information about their distribution and heterogeneity across tumor  
102 compartments, likely providing a biased analysis of rare DC subsets.

103 Here, we dissected the spatial organization of DC subsets of cutaneous lesions from advanced  
104 melanoma patients according to their clinical response to immunotherapy using a multiplexed  
105 immunofluorescence analysis of the whole tumor tissue. We demonstrated that pDCs are the most  
106 abundant DC population, followed by conventional cDC1 and mature DCs, which are equally  
107 represented. Despite varying densities, all DC subsets were associated with a favorable response to  
108 ICI. Interestingly, tumor-associated DCs (TA-DC) formed various clusters giving rise to four distinct  
109 spatial ecosystems composed of pDC only, mature DC only or mixed aggregates including pDCs/cDC1  
110 or pDCs/mature DCs. Finally, we unveiled that cellular interactions between cDC1 and CD8+ T cells  
111 were strongly associated with a positive response to immunotherapy in melanoma patients.

112

## 113 **Results**

### 114 **Several DC subsets simultaneously infiltrate human cutaneous melanoma lesions**

115 In order to clarify the role of DC populations in the response to immune checkpoint inhibitors (ICI) in  
116 human, we analyzed their *in situ* distribution in 41 advanced melanoma patients (MELPREDICT cohort)  
117 from whom we had collected formalin-fixed paraffin-embedded (FFPE) cutaneous lesions at diagnosis.  
118 Clinical characteristics of the cohort are summarized in **Fig. 1**. All patients received a first-line  
119 treatment with ICI (anti-PD-1 monotherapy or in combination with anti-CTLA-4) as per standard of care  
120 at the Lyon Sud Hospital (Lyon, France). Patient skin biopsies of primary sites (n=20, 49%) or metastases  
121 (n=21, 51%) were performed prior immunotherapy onset. An automated seven-color multiplex  
122 immunofluorescence staining was set up to identify DC subsets (**Fig. 2A**), using DAPI staining to  
123 perform cell annotation, BDCA2 (also named CLEC4C/CD303) for pDC detection, DC-LAMP (LAMP3) for  
124 mature DCs and CD1a for LCs. The cDC1 subset was detected using XCR1, the specificity of which was  
125 previously validated using coupled staining of CLEC9A mRNA by *in situ* hybridization and XCR1 by  
126 immunofluorescence (27). As cDC2 represent a very heterogenous population with many markers  
127 shared with macrophages, we couldn't include this subset in the present analysis as we would need at  
128 least ten markers to identify them properly. CD8 and SOX10 were used to stain cytotoxic T lymphocytes  
129 and melanoma cells, respectively. Tissues were annotated by a pathologist to select the whole tumor  
130 area. Tissue and cell segmentation, marker quantification, as well as cell phenotyping were performed  
131 using Inform software (**Supp. Fig. 1A**). We confirmed that each marker was specifically expressed by  
132 the corresponding cell population, thus validating the algorithm used for cell phenotyping (**Supp. Fig.**  
133 **1B**). Whole tissue sections, representing a median total surface of analyzed tissue of 27.5 mm<sup>2</sup> (+/-  
134 78.9 mm<sup>2</sup>, about 50-fold larger than a TMA, **Supp. Fig. 1C**), were then analyzed to decipher the spatial  
135 organization. We conducted a bioinformatic 2D reconstitution of the tissue using the spatial  
136 coordinates of the annotated cells, and obtained a readout of the cellular organization of 31 whole  
137 tumors (**Supp. Fig. 1D**). Of note, LCs were never observed in tumor nests or tumor-associated stroma,  
138 but were only located in adjacent healthy skin, and were therefore excluded from subsequent analyses  
139 (**Fig. 2A**).

140 A quantitative analysis of whole tumors revealed that total DCs represented 0.64% (+/- 0.67%) of all  
141 annotated cells (median of 145,886 total cells) (**Fig 2B-C**). We detected a median value of 24.7  
142 DCs/mm<sup>2</sup>, ranging from 0.77 DCs/mm<sup>2</sup> to 162.6 DCs/mm<sup>2</sup> across samples, highlighting a consequent

143 inter-patient heterogeneity (**Fig 2B**). The pDC subset was the most abundant, accounting for 70.93%  
144 of all DCs, with a median density of 14.73 cell/mm<sup>2</sup> (+/- 28.9 cells/mm<sup>2</sup>) (**Fig. 2D and Supp. Fig 1E**).  
145 Interestingly, we observed that cDC1 were as abundant as mature DCs (14.88% and 14.80% of all DCs,  
146 respectively) with a median of 4.24 mature DCs/mm<sup>2</sup> (+/- 3.9 cells/mm<sup>2</sup>) and 3.28 cDC1/mm<sup>2</sup> (+/- 3.5  
147 cells/mm<sup>2</sup>) (**Fig. 2D**). Hence, our results highlight for the first time the *in situ* localization of DC subsets  
148 in whole samples of cutaneous melanoma and reveal that pDC are the most abundant whereas cDC1  
149 are just as many as matDC.

150

### 151 **While cDC1 are spatially dispersed, mature DCs and pDCs form clusters in melanoma lesions**

152 To decipher the spatial organization of each DC subset, we first analyzed their homotypic aggregation  
153 using the k-nearest neighbors' algorithm (kNN), and observed that the homotypic distance between  
154 cDC1 cells was significantly greater than that between pDCs and between mature DCs (**Fig. 3A**). Hence,  
155 cDC1 displayed a scattered distribution compared to mature DCs and pDCs; the latter being the most  
156 aggregated subset. However, we visually noticed that mature DCs were less dispersed than other DC  
157 subsets and more organized in patches. To rule out the bias due to the higher density of pDCs  
158 compared to other TA-DC populations, we used the SPIAT R package to define homotypic aggregates  
159 of DC subsets. Briefly, SPIAT defined DC cell clusters as cells from the same subset within a circle of  
160 100µm from each other and composed of at least 10 pDCs or mature DCs (**Fig. 3B**). To estimate the  
161 area of each aggregate, we calculated the perimeter of a convex hull defined by cells in the outermost  
162 layer of each DC aggregate. We observed that mature DC aggregates are smaller in size and further  
163 apart than pDC aggregates that remain closer together (**Fig 3C-D**). These results thus illustrate a  
164 preferential spatial organization of the distinct DC subsets *in situ*, suggesting their different modes of  
165 action to regulate the immune response.

166

### 167 **Melanoma-infiltrating DC subpopulations spatially organize into four different ecosystems**

168 As interactions and cell cooperation between DC subsets could be crucial in cancer immunity (28), we  
169 thus analyzed the co-localization and spatial organization of all DC subsets to identify heterotypic DC  
170 aggregates using the SPIAT tool. Interestingly, 30% of cDC1 were isolated cells and less than 45%  
171 belonged to DC aggregates (>10 DCs) (**Fig. 4A**). In contrast, pDCs were mostly present in high density  
172 aggregates (**Fig. 4A**). Next, we selected the 805 heterotypic aggregates identified across the 31 patients  
173 and performed an unsupervised hierarchical clustering based on the frequency of each subset within  
174 each aggregate to identify preferential co-localizations between DC subsets defining distinct  
175 ecosystems (**Fig 4B, Supp. Fig. 2**). Using this strategy, we unveiled 6 distinct clusters of DC aggregates:  
176 a large cluster mainly enriched in pDCs (C6), a cluster mainly enriched in mature DCs (C2), 2 clusters  
177 with a mixed composition of cDC1 and pDC (C3-C5), 1 cluster with a mixed composition of mature DCs  
178 and pDCs (C1), and one cluster composed of only 2 aggregates belonging to the same tumor and with  
179 a mixed composition between cDC1 and mature DCs (C4). Interestingly, we did not identify aggregates  
180 enriched specifically in cDC1, consistent with their scattered distribution evidenced above. This  
181 analysis unveiled that DC subsets were spatially organized into four main ecosystems; two of these  
182 mainly displayed a homotypic composition, enriched in either pDCs or mature DCs, and two  
183 heterotypic ecosystems composed of pDCs and cDC1 (purple), or of pDCs and mature DCs (green) (**Fig**  
184 **4D down**).

185 To gain insight into variations in the tumor microenvironment (TME) surrounding the distinct DC  
186 ecosystems, we performed high-plexed spatial protein analysis (GeoMx<sup>®</sup> Digital Space Profiler,  
187 Nanostring<sup>®</sup>) on 8 patients, using a panel consisting of 32 markers, encompassing the various immune  
188 populations and immune checkpoints.

189 Given that DC-LAMP is frequently used to characterize TLS, we assumed that mature DC-enriched  
190 aggregates (detected using the same marker) corresponded to tertiary lymphoid structures (TLS) (29).  
191 We thus focused on the three other ecosystems that are undescribed to date. Interestingly, pDC-cDC1  
192 aggregates expressed high levels of HLA-DR, STING and B7-H3 levels, suggesting a crosstalk between  
193 these two subsets leading to their mutual activation. Moreover, this ecosystem also expressed the  
194 highest level of TIM3 (**Fig 4E**). This receptor is present on memory or activated T lymphocytes (LT) (Th1  
195 LT-CD4, regulatory LT [Treg] and cytotoxic LT-CD8<sup>+</sup> [Tc1]), B lymphocytes, NK cells, but also myeloid  
196 cells including DCs and thus suggesting an immune activation associated with pDC-cDC1 aggregates  
197 (**Fig 4E**).

198

199 **The density of DC subpopulations and their spatial organization are crucial for melanoma patient's**  
200 **response to ICI.**

201 We then assessed the association between each DC subsets' density/spatial organization and the  
202 response to immunotherapy. Patients were stratified as responding (R, n=12) or non-responding (NR,  
203 n=19) according to their progression-free-survival (PFS) evaluated at 1-year following onset of first-line  
204 immunotherapy (**Fig. 1**). As shown in Supplementary Table 1, there is no confounding parameter  
205 associated with the response. Interestingly, the density of each subset, namely cDC1, mature DCs and  
206 pDCs was significantly higher in responding patients (**Fig. 5A**). Total DC aggregates were also enriched  
207 in responding patients (**Fig. 5B**), supporting our results on the preferential spatial organization pattern  
208 of mature DCs and pDCs as aggregates. Interestingly, responding patients displayed DC subsets closer  
209 together both in the case of pDCs and mature DCs, suggesting that homotypic organization and closer  
210 interactions between pDCs or mature DCs are essential for the efficacy of immunotherapy (**Fig. 5C-E**).  
211 Conversely, the median distance separating cDC1 was not associated with response to ICI, suggesting  
212 that cDC1 may spatially interact with other immune cells to regulate the tumor immune response (**Fig.**  
213 **5E-F**).

214

215 **Spatial organization between cDC1 and CD8<sup>+</sup> T cells is pivotal for response to ICI in melanoma**  
216 **patients**

217 As DCs are instrumental in activating cytotoxic T cells, we next evaluated the spatial interconnections  
218 between DC subsets and intra-tumoral CD8<sup>+</sup> T cells according patients' response to immunotherapy.  
219 We observed that the CD8<sup>+</sup> T cell density did not differ between responding and non-responding  
220 patients (**Fig. 6A**). We confirmed these results by scoring the CD8<sup>+</sup> T cell signature using MCP counter  
221 from our RNA-seq data of the cohort that we previously published (30) (**Fig. 6B**). We then focused on  
222 CD8<sup>+</sup> T cell distribution by using the kNN algorithm and observed that a shorter distance between CD8<sup>+</sup>  
223 T cells was associated with a better response to immunotherapy (**Fig. 6C**). To gain further insight into  
224 the spatial architecture of CD8<sup>+</sup> T cells, we performed a Delaunay triangulation to reconstitute  
225 networks between all cells (**Fig. 6D**). Interestingly, the number of links between CD8<sup>+</sup> T cells was  
226 significantly higher in responders (**Fig. 6E**). Together, these results suggest that the structure of the  
227 CD8<sup>+</sup> T cell network, rather than its density, is required for the efficacy of immunotherapy. Given that  
228 the DC composition in the TME influences CD8<sup>+</sup> T cell infiltration and activation (31,32), we then  
229 analyzed the correlation and spatial organization between CD8<sup>+</sup> T cells and DC subsets. The correlation  
230 between CD8<sup>+</sup> T cell density and mature DCs was greater than that with other DC subsets (**Fig. 6F**).  
231 Interestingly, although we found a similar distance between all DC subsets and their closest CD8<sup>+</sup> T cell  
232 neighbor (**Fig. 6G**), the median distance between CD8<sup>+</sup> T cells and cDC1 was markedly reduced in  
233 responding patients (**Fig. 6H**). Consistently, we observed a greater number of connections between  
234 CD8<sup>+</sup> T cells and cDC1 in responding patients (**Fig. 6I**). In contrast, the number of links between CD8<sup>+</sup> T  
235 cells and mature DCs or pDCs was not associated with response to ICI (**Fig. 6J**). Based on these results,



236 we believe that the spatial organization of CD8<sup>+</sup> T cells, in particular their crosstalk with cDC1, is  
237 important and could be predictive of patient response to ICI in melanoma.

238

## 239 Discussion

240

241 Dendritic cells play a critical role in orchestrating and shaping the immune response. Despite previous  
242 studies demonstrating the infiltration of pDCs, cDC1, cDC2, LCs and mature DCs in dilacerated  
243 melanoma samples (22), the *in situ* spatial organization of DCs and their impact on prognosis and  
244 response to immunotherapy remains largely unknown. Moreover, previous studies describing tumor-  
245 associated DC subsets by *in situ* approaches focused on up to two subsets at once and worked on small  
246 areas of tumor tissue (26,33–35). It precluded capturing the complexity and heterogeneity of their  
247 spatial distribution in tumors. In this study we demonstrated for the first time the simultaneous  
248 presence of pDCs, cDC1, LCs and mature DCs in cutaneous melanoma patient lesions *by in situ*  
249 multiplexed immunofluorescence and the importance of the cDC1-CD8 interaction to favor the  
250 response to immunotherapy.

251 LCs in skin cancers were reported to contribute to skin inflammation and to tumor immune evasion in  
252 melanoma (36). We observed that LCs were always excluded from tumor nests or tumor-associated  
253 stroma but were exclusively present in healthy skin. Neagu *et al.* showed that CD1a<sup>+</sup> LC were either  
254 absent or scarce within the tumor mass and were associated with good prognostic features such as  
255 thinner and not ulcerated tumors (37). This suggests a limited involvement of LCs in the anti-tumor  
256 response and corroborates our recent findings on TCGA public data, querying the prognostic impact of  
257 LCs using a LC gene signature, and showing no impact on survival, including for melanoma patients  
258 (23). This also agrees with Howell *et al.*, who demonstrated that melanomas fail to activate LC  
259 migration to lymph nodes until tumors reach a critical size (38).

260 Here, for the first time, cDC1 were detected *in situ* to analyze their localization and their spatial  
261 organization compared to other DC subsets. In mice, cDC1 are essential for the induction of anti-tumor  
262 immunity and responses to immunotherapies. In a conditional PD-L1 knock-out model on cDC1, Oh *et*  
263 *al.* reported that, despite PD-L1 being expressed on most myeloid cells, inhibiting PD-L1 on cDC1 was  
264 sufficient to inhibit tumor growth by increasing the infiltration of CD8<sup>+</sup> T cells with an activated  
265 phenotype (PD1<sup>+</sup>, LAG-3<sup>+</sup>, TIM-3<sup>+</sup>) (39). Moreover, while the treatment of WT mice with a combination  
266 of immune checkpoints blockade (anti-CD137 + anti-PD-L1) led to the rejection of B16 melanomas,  
267 *Batf3*<sup>-/-</sup> mice lacking cDC1 did not respond to this combined immunotherapy (40). In the same tumor  
268 model, cDC1 were also essential for the response to anti-PD-L1 combined with a BRAF inhibitor (41,42).  
269 In human samples, we and others have shown that a high cDC1 infiltration score is associated with  
270 favorable patient prognosis (13,23,25). Moreover, Barry *et al.* demonstrated the association between  
271 cDC1 signature enrichment and improved survival in patients with metastatic melanoma. They showed  
272 that cDC1 were more abundant in melanoma patients responding to first-line immunotherapy  
273 compared to non-responding patients by flow cytometry on dissociated tumors (43). However,  
274 cytometry and transcriptomic analysis obviously do not provide information about DC subset  
275 localization *in situ*, their interaction with other immune populations and how this could impact the  
276 response to immunotherapy.

277 The spatial organization of CD8<sup>+</sup> T cells rather than their abundance determines the response to  
278 immune checkpoint inhibitors. Indeed, we observed here that in responding patients, CD8<sup>+</sup> T cells  
279 formed dense compartments with strong homotypic interactions. In contrast, CD8<sup>+</sup> T cells presented  
280 a more diffuse distribution in non-responding patients. Similar results were found by Xiao *et al.* using

281 imaging mass cytometry on melanoma tissue (44). However, that analysis did not focus on CD8<sup>+</sup> T cells  
282 but included all lymphocytes (B cells, CD4<sup>+</sup> T cells, CD8<sup>+</sup> T cells, double-positive T cells and Treg) and  
283 did not provide information about the co-localization with DC subsets. The different spatial  
284 relationships between DCs and CD8<sup>+</sup> T cells suggest the existence of specificities in driving the anti-  
285 tumor immune response according to the DC subset involved.

286 The mechanisms underlying the impact of cDC1 on patient outcome are largely unknown. The ability  
287 of cDC1 to produce large amounts of CXCL9/10 and their expression of XCR1 are two properties that  
288 suggest a close cross-talk with immune effector cells involved in a cytotoxic response. It has been  
289 previously shown that cDC1 have a greater capacity to activate cytotoxic immune responses through  
290 antigen cross-presentation compared to other DC subsets (14,45–47). Moreover, the bidirectional  
291 cross-talk between DCs and NK cells has been elucidated in several studies (15,48). While DCs can  
292 activate NK cells, these latter can in turn affect the recruitment and maturation of DCs via FLT3 and  
293 IFN- $\gamma$  production. In this work, we unveiled no correlation between CD8<sup>+</sup> T cell and cDC1 infiltration.  
294 However, in patients responding to immunotherapy, cDC1 were closer to CD8<sup>+</sup> T cells than in non-  
295 responding patients. Of note, no difference in proximity between pDCs or mature DCs and CD8<sup>+</sup> T cells  
296 was found according to the response to immunotherapy. This supports the idea of a privileged  
297 interaction between cytotoxic lymphocytes and cDC1 to orchestrate the anti-tumor response in  
298 immunotherapy-treated patients as it was recently shown in melanoma mouse models by Meiser *et al.*  
299 *et al.* and Magen *et al.* (32,49). Antoranz *et al.* recently demonstrated that the phenotype and function  
300 of CD8<sup>+</sup> T cells varied according to their localization, closer to the stroma-tumor interface or to the  
301 center of the melanoma tissue (50). In addition, CD8<sup>+</sup> T cells outside the tumor are enriched in  
302 TCF1/TCF7 transcription factors (51) with a weak expression of co-inhibitor molecules, representing a  
303 functional population with likely anti-tumor activity. Conversely, CD8<sup>+</sup> T cells closer to the tumor edge  
304 and infiltrating the tumor, are more likely characterized by a progressively higher expression of co-  
305 stimulatory molecules such as PD-1, TIM-3 and VISTA, acquiring a more exhausted and dysfunctional  
306 phenotype (52). Investigating the phenotypes and functional characteristics of CD8<sup>+</sup> T cells interacting  
307 with cDC1 would be informative on their contribution to activate an anti-tumor cytotoxic response.

308  
309 Moreover, based on our spatial analysis of DC aggregates, we demonstrated that patients with tumors  
310 enriched in pDC aggregates were more likely to respond to immunotherapy. Previous studies  
311 alternatively reported a negative or a positive prognostic impact of pDCs in cancer (22). pDCs can  
312 directly attack tumor cells in a TNF-related apoptosis-inducing ligand (TRAIL)-dependent manner or  
313 can contribute to an immunosuppressive microenvironment, priming cells involved in IL-10 production  
314 such as Tregs, via the ICOS-ICOSL axis stimulation (53). Some receptors uniquely expressed by human  
315 pDCs, such as ILT7 and NKp44 can also dampen IFN- $\alpha$  production, leading to Treg expansion and could  
316 favor tumor immune escape (10). Recent work also suggested that pDCs might induce and regulate  
317 tumor-directed T cell responses within TLS (54). pDCs have been described in colon cancer-associated  
318 TLS and, in line with our results, were preferentially located close to CD4 T cells within the T cell zone  
319 and frequently presented an activated phenotype (IRF7+). Here, our work unveiled aggregates in which  
320 pDCs clustered with cDC1 (pDC/cDC1 aggregates) or mature DCs (pDC/mature DC aggregates).  
321 Previous studies focusing on the localization and phenotype of TLS-associated DCs, demonstrated that  
322 a high frequency of TLS-associated DCs expressing the maturation marker LAMP3/DC-LAMP was linked  
323 to a robust infiltration of T cells (55). The density of mature DCs was also associated with expression  
324 of genes related to T-cell activation, Th1 phenotype and cytotoxic polarization. Moreover, more TLS-  
325 associated DCs was correlated with long-term survival and response to immunotherapy (56). The  
326 pDC/cDC1 enriched aggregates we described herein suggest the existence of a pDC-cDC1 crosstalk and,  
327 while this has never been confirmed in human, some evidence from infectious models supports this

328 hypothesis. Indeed, the analysis of DC subsets within draining lymph nodes during vaccinia virus  
329 infection showed that infected cDC1 recruited pDCs via the CCR5 receptor (57). Albeit, mobilized pDCs  
330 increased the expression of maturation markers (CD80, CD86 and CD40) and antigen presentation of  
331 non-infected resident cDC1 recruited by activated CD8<sup>+</sup> T cells via the XCL1/XCR1 axis. In our current  
332 study, high-plexed spatial protein analysis (GeoMx DSP) also strongly suggests this crosstalk,  
333 demonstrating higher STING, B7-H3, and HLA-DR levels in those aggregates. Finally, in cancer, a  
334 synergistic effect between pDCs and cDCs in the activation of a cytotoxic response has been suggested  
335 in a mouse model (58).

336 In conclusion, we implemented for the first time an *in situ* approach to characterize cDC1 infiltration  
337 in melanoma tissue along with their spatial relationship with other DC subsets and CD8<sup>+</sup> T lymphocyte  
338 infiltration. Whereas all subsets were shown to be enriched in melanoma patients responding to  
339 immunotherapy, the close contact between CD8<sup>+</sup> T cells and cDC1, and the organization of DCs in  
340 aggregates enriched in pDCs are particularly important characteristics linked to response to  
341 immunotherapy. Hence, cell density may not be the best criterion to evaluate to predict patients'  
342 response to immunotherapy, unlike the spatial organization/interactions of immune cell subsets  
343 within the tumor, which seems essential for generating an efficient anti-tumor immune response.

344

## 345 **Materials and Methods**

### 346 **Patient samples**

347 Melanoma tumor samples were obtained from surgical specimens collected from 41 advanced  
348 melanoma patients at diagnosis in the framework of their standard of care, with written informed  
349 consent for the use of samples for research purposes obtained from all patients prior to analyses.  
350 Formalin-fixed paraffin-embedded (FFPE) cutaneous tumor samples were collected (1 slide of 4 μm)  
351 through the Biological Resource Center of the Lyon Sud Hospital (Hospices Civils de Lyon). All patients  
352 received a first-line treatment with immune checkpoint inhibitors (anti-PD1 alone or associated with  
353 anti-CTLA4) as per the standard of care. Patients were stratified as responding (R) or non-responding  
354 (NR) based on progression-free survival (PFS), measured through trimestral clinical evaluation of tumor  
355 extension by CTAP scan according to RECIST1.1 criteria, with a cut-off at one year following first-line  
356 immunotherapy initiation. No clinical parameters were found associated to the clinical response to  
357 immunotherapy in this cohort (Supp Table 1). This study was approved by a regional ethics board  
358 (Comité de Protection des Personnes Ile de France XI, Saint-Germain-en-Laye, France) for the use of  
359 clinical samples and the collection of associated clinical data according to the CNIL regulation  
360 (authorizations n°22\_5680 and n°22\_5896).

361

### 362 **Multiplex immunofluorescence staining**

363 Markers for tumor-infiltrating DC identification were chosen based on previous literature. In particular,  
364 we selected first DAPI staining for cell segmentation, BDCA2 (Goat Polyclonal, R&D Systems, AF1376)  
365 for pDC, DC-LAMP (Rabbit 1010E1.01, Dendritics, DDX0191P) for mature DCs, XCR1 (Rabbit D2F8T, Cell  
366 Signaling, 44665S) for cDC1, CD1a (Mouse 010, DAKO, M3571) for LCs, CD8 (Mouse C8/144B, DAKO,  
367 M7103) for T cells and SOX10 (Mouse A-2, Santa Cruz, Sc-365692) for melanoma cells. We set up a  
368 sequential seven-colors multiplexed immunofluorescence by sequential staining cycles using the  
369 tyramide-signal amplification (TSA)-based OPAL seven-color Automation Research Detection Kit (Leica,  
370 DS9777) on the Bond RX automatic stainer (Leica Biosystems). Secondary antibodies used to amplify  
371 the signal included the Anti-Goat IgG HORSERADISH Peroxidase (HRP) Conjugated (Donkey Polyclonal,  
372 Life Technologies, A16005), the Anti-Rabbit IgG, HORSERADISH Peroxidase (HRP) Conjugated (Goat  
373 Polyclonal, Life Technologies, A1604) and the Anti-Rat IgG, HORSERADISH Peroxidase (HRP)  
374 Conjugated (Goat Polyclonal, Thermo Scientific, 31470). Different antigen retrieval reagent conditions,



375 antibody concentrations, and incubation times were tested for each marker of interest on tonsil FFPE  
376 samples and melanoma. Optimized staining conditions are summarized in **Sup Table 3**.

377

### 378 **Dendritic cell annotations and Spatial analysis**

379 Stained FFPE slides were scanned on a Vectra® Polaris™ Imaging System (Akoya, Biosciences,  
380 Marlborough, MA, USA) at X20 magnification. Slides were then visualized with Phenochart (1.0.12  
381 version, AKOYA Biosciences) for multispectral imaging and were annotated and quantified using  
382 inForm Tissue Analysis Software (Akoya, Biosciences, Marlborough, MA, USA). The whole tumor area  
383 including the invasive margin, defined as the region separating host tissue from the malignant nests  
384 within a 1 mm distance, was analyzed for each sample.

385 For the Nearest Neighbors analysis (KNN), we used the minimum distance between each pair of cells  
386 of different or identical phenotypes using the k-Nearest Neighbors (KNN) algorithm within the  
387 `sklearn.neighbors` package with `k=1`. Using the R package SPIAT  
388 (<https://github.com/TrigosTeam/SPIAT>), we identified clusters of cells located within a specified  
389 distance of each other. To achieve this, we used Euclidean distances to cluster cells based on their  
390 spatial proximity. We defined cells with a 100µm radius as neighbors, and a minimum of three cells  
391 were required to constitute a cluster. Then, using the `scipy.spatial` module `ConvexHull` function (SciPy  
392 library in Python,  
393 <https://docs.scipy.org/doc/scipy/reference/generated/scipy.spatial.ConvexHull.html>), we computed  
394 convex hulls defined by cells in the outermost layer of aggregates. The distance between two convex  
395 hulls was calculated using the minimum distance between their closest points which was obtained by  
396 indexing the `cdist` (function from the module `scipy.spatial.distance` that computes the distance  
397 between points) matrix with the `vertices` attribute of the `ConvexHull` objects. Aggregate analysis was  
398 performed using the R package SPIAT: DC aggregates were defined as a group of DCs (min 10) included  
399 within a 100 µm radius around a reference DC. For Network and close connection analysis, we used  
400 the Delaunay Triangulation method and included all annotated cells (DC subsets phenotypes, CD8 T  
401 CELL phenotype and “other”) to generate the network using a cut-off of 30 µm to focus on close  
402 connections.

403

### 404 **Digital Spatial Profiling**

405 NanoString DSP technology was used on FFPE tissue from 8 representative patients. Tissue sections  
406 were incubated with a cocktail of 32 unique oligonucleotide-conjugated antibodies and counterstained  
407 with a nuclear stain. Antibody oligos were photocleaved within the selected ROIs and collected for  
408 nCounter analysis. nCounter digital barcode counts for each antibody and ROI sample were first  
409 normalized using internal spike-in controls.

410

### 411 **Statistical analyses**

412 Mann-Whitney tests for unpaired samples and Wilcoxon tests for paired samples were performed to  
413 compare two groups. To compare more groups, Kruskal-Wallis tests were performed for unpaired  
414 samples and Friedman tests for paired samples. All graphs show each sample and the median value.  
415 Statistical significance: \* $p < 0.05$ , \*\* $p < 0.01$ , \*\*\* $p < 0.001$ , \*\*\*\* $p < 0.0001$ .

416

417 **Bulk-RNA-seq data and MCP counter analysis:** As previously described in Plaschka *et al.* (30), the GEO  
418 accession number for this cohort is GSE169203. MCP counter was used (59) to estimate the relative  
419 abundance of several populations of immune cells.

420

### 421 **Acknowledgments**

422 We would like to thank the staff of the core facilities at the Cancer Research Center of Lyon (CRCL) and  
423 the BRC (Biological Resources Center) of Lyon Sud Hospital (Hospices civils de Lyon). Elisa Gobbin was  
424 supported by ESMO (any views, opinions, findings, conclusions or recommendations expressed in this  
425 material are those solely of the authors and do not necessarily reflect those of ESMO) and ITMO  
426 INSERM. Margaux Hubert was supported by the ARC foundation. We would like also to thank our  
427 financial supports : INSERM, INCA-DGOS PRTK\_2017-022 (SD, CC), INCA PLBIO INCa\_4508, ANRS, ARC  
428 sign'it 2019, Ligue contre le Cancer (Régionale Auvergne-Rhône-Alpes et Saône-et-Loire, Comité de la  
429 Savoie, Comité de l'Ain), the Région Auvergne-Rhône-Alpes, SIRIC project (LYRIC, grant no. INCa\_4664)  
430 and the LABEX DEVweCAN (ANR-10-LABX-0061) of the University of Lyon, within the program  
431 "Investissements d'Avenir" organized by the French National Research Agency (ANR), the Société  
432 Française de Dermatologie (JC), the association Melarnaud and Vaincre le Mélanome (JC, SD).  
433 The authors declare that the research was conducted in the absence of any commercial or financial  
434 relationships that could be construed as a potential conflict of interest.

435

### 436 **Contributions**

437 E.G designed experiments, analyzed results, did statistical analyses and wrote the manuscript. M.H.  
438 designed experiments, did bioinformatics, analyzed results, and did statistical analyses. L.H. and D.L.  
439 did bioinformatics, analyzed results, and did statistical analyses. A.C.D., C.S, S.B., P.D., L.B., J.B. and  
440 L.M. performed some experiments and analyzed results. O.H. performed the pathological annotations  
441 of samples. V.B. and M.G. provided help and advice for pathological annotations and Inform analyses.  
442 J.L. and J.P. performed DSP analysis. C.C. and B.D. provided strategic advice and revised the manuscript.  
443 S.D. and A.E. provided human samples and/or clinical data, strategic advice and revised the  
444 manuscript. J.V-G. and J.C. designed experiments, supervised the research, and wrote the manuscript.

445

446

### 447 **References:**

- 448 1. Robert C, Ribas A, Schachter J, Arance A, Grob JJ, Mortier L, et al. Pembrolizumab versus ipilimumab  
449 in advanced melanoma (KEYNOTE-006): post-hoc 5-year results from an open-label, multicentre,  
450 randomised, controlled, phase 3 study. *The Lancet Oncology*. 2019 Sep 1;20(9):1239–51.
- 451 2. Sharma P, Hu-Lieskovan S, Wargo JA, Ribas A. Primary, Adaptive, and Acquired Resistance to Cancer  
452 Immunotherapy. *Cell*. 2017 Feb 9;168(4):707–23.
- 453 3. Becht E, Giraldo NA, Dieu-Nosjean MC, Sautès-Fridman C, Fridman WH. Cancer immune contexture  
454 and immunotherapy. *Curr Opin Immunol*. 2016 Apr;39:7–13.
- 455 4. Dunn GP, Old LJ, Schreiber RD. The three Es of cancer immunoediting. *Annu Rev Immunol*.  
456 2004;22:329–60.
- 457 5. Chen DS, Mellman I. Oncology meets immunology: the cancer-immunity cycle. *Immunity*. 2013 Jul  
458 25;39(1):1–10.
- 459 6. Dzionek A, Fuchs A, Schmidt P, Cremer S, Zysk M, Miltenyi S, et al. BDCA-2, BDCA-3, and BDCA-4:  
460 three markers for distinct subsets of dendritic cells in human peripheral blood. *J Immunol*. 2000 Dec  
461 1;165(11):6037–46.
- 462 7. MacDonald KPA, Munster DJ, Clark GJ, Dzionek A, Schmitz J, Hart DNJ. Characterization of human  
463 blood dendritic cell subsets. *Blood*. 2002 Dec 15;100(13):4512–20.
- 464 8. Villadangos JA, Young L. Antigen-presentation properties of plasmacytoid dendritic cells. *Immunity*.  
465 2008 Sep 19;29(3):352–61.

- 466 9. Aspod C, Leloup C, Reche S, Plumas J. pDCs efficiently process synthetic long peptides to induce  
467 functional virus- and tumour-specific T-cell responses. *Eur J Immunol.* 2014 Oct;44(10):2880–92.
- 468 10. Sisirak V, Faget J, Gobert M, Goutagny N, Vey N, Treilleux I, et al. Impaired IFN- $\alpha$  production by  
469 plasmacytoid dendritic cells favors regulatory T-cell expansion that may contribute to breast cancer  
470 progression. *Cancer Res.* 2012 Oct 15;72(20):5188–97.
- 471 11. Bachem A, Güttler S, Hartung E, Ebstein F, Schaefer M, Tannert A, et al. Superior antigen cross-  
472 presentation and XCR1 expression define human CD11c+ CD141+ cells as homologues of mouse  
473 CD8+ dendritic cells. *Journal of Experimental Medicine.* 2010;jem. 20100348.
- 474 12. Sancho D, Joffre OP, Keller AM, Rogers NC, Martínez D, Hernanz-Falcón P, et al. Identification of a  
475 dendritic cell receptor that couples sensing of necrosis to immunity. *Nature.* 2009 Apr  
476 16;458(7240):899–903.
- 477 13. Böttcher JP, Bonavita E, Chakravarty P, Brees H, Cabeza-Cabrero M, Sammicheli S, et al. NK Cells  
478 Stimulate Recruitment of cDC1 into the Tumor Microenvironment Promoting Cancer Immune  
479 Control. *Cell.* 2018 Feb 22;172(5):1022-1037.e14.
- 480 14. Jongbloed SL, Kassianos AJ, McDonald KJ, Clark GJ, Ju X, Angel CE, et al. Human CD141+ (BDCA-3)+  
481 dendritic cells (DCs) represent a unique myeloid DC subset that cross-presents necrotic cell  
482 antigens. *J Exp Med.* 2010 Jun 7;207(6):1247–60.
- 483 15. Deauvieau F, Ollion V, Doffin AC, Achard C, Fonteneau JF, Verronese E, et al. Human natural killer  
484 cells promote cross-presentation of tumor cell-derived antigens by dendritic cells. *Int J Cancer.* 2015  
485 Mar 1;136(5):1085–94.
- 486 16. Sakref C, Bendriss-Vermare N, Valladeau-Guilemond J. Phenotypes and Functions of Human  
487 Dendritic Cell Subsets in the Tumor Microenvironment. *Methods Mol Biol.* 2023;2618:17–35.
- 488 17. Clayton K, Vallejo AF, Davies J, Sirvent S, Polak ME. Langerhans Cells-Programmed by the Epidermis.  
489 *Front Immunol.* 2017;8:1676.
- 490 18. Gerhard GM, Bill R, Messemaker M, Klein AM, Pittet MJ. Tumor-infiltrating dendritic cell states are  
491 conserved across solid human cancers. *J Exp Med.* 2021 Jan 4;218(1):e20200264.
- 492 19. Maier B, Leader AM, Chen ST, Tung N, Chang C, LeBerichel J, et al. A conserved dendritic-cell  
493 regulatory program limits antitumour immunity. *Nature.* 2020 Apr;580(7802):257–62.
- 494 20. Garris CS, Arlauckas SP, Kohler RH, Trefny MP, Garren S, Piot C, et al. Successful anti-PD-1 cancer  
495 immunotherapy requires T cell-dendritic cell crosstalk involving the cytokines IFN- $\gamma$  and IL-12.  
496 *Immunity.* 2018 Dec 18;49(6):1148-1161.e7.
- 497 21. Sosa Cuevas E, Bendriss-Vermare N, Mouret S, De Fraipont F, Charles J, Valladeau-Guilemond J, et  
498 al. Diversification of circulating and tumor-infiltrating plasmacytoid DCs towards the P3 (CD80+  
499 PDL1-)-pDC subset negatively correlated with clinical outcomes in melanoma patients. *Clin Transl  
500 Immunology.* 2022;11(5):e1382.
- 501 22. Hubert M, Gobbini E, Bendriss-Vermare N, Caux C, Valladeau-Guilemond J. Human Tumor-  
502 Infiltrating Dendritic Cells: From in Situ Visualization to High-Dimensional Analyses. *Cancers (Basel).*  
503 2019 Jul 30;11(8).
- 504 23. Hubert M, Gobbini E, Couillault C, Manh TPV, Doffin AC, Berthet J, et al. IFN-III is selectively  
505 produced by cDC1 and predicts good clinical outcome in breast cancer. *Sci Immunol.* 2020 Apr  
506 17;5(46):eaav3942.

- 507 24. Barry KC, Hsu J, Broz ML, Cueto FJ, Binnewies M, Combes AJ, et al. A natural killer-dendritic cell axis  
508 defines checkpoint therapy-responsive tumor microenvironments. *Nat Med*. 2018;24(8):1178–91.
- 509 25. Broz ML, Binnewies M, Boldajipour B, Nelson AE, Pollack JL, Erle DJ, et al. Dissecting the tumor  
510 myeloid compartment reveals rare activating antigen-presenting cells critical for T cell immunity.  
511 *Cancer Cell*. 2014 Nov 10;26(5):638–52.
- 512 26. Ladányi A, Kiss J, Somlai B, Gilde K, Fejos Z, Mohos A, et al. Density of DC-LAMP(+) mature dendritic  
513 cells in combination with activated T lymphocytes infiltrating primary cutaneous melanoma is a  
514 strong independent prognostic factor. *Cancer Immunol Immunother*. 2007 Sep;56(9):1459–69.
- 515 27. Bayerl F, Bejarano DA, Bertacchi G, Doffin AC, Gobbin E, Hubert M, et al. Guidelines for visualization  
516 and analysis of DC in tissues using multiparameter fluorescence microscopy imaging methods. *Eur*  
517 *J Immunol*. 2023 Jan 9;e2249923.
- 518 28. Liu C, Lou Y, Lizée G, Qin H, Liu S, Rabinovich B, et al. Plasmacytoid dendritic cells induce NK cell-  
519 dependent, tumor antigen-specific T cell cross-priming and tumor regression in mice.  
520 *2008;118(3):1165–75*.
- 521 29. Klein C, Devi-Marulka P, Dieu-Nosjean MC, Germain C. Development of Tools for the Selective  
522 Visualization and Quantification of TLS-Immune Cells on Tissue Sections. *Methods Mol Biol*.  
523 2018;1845:47–69.
- 524 30. Plaschka M, Benboubker V, Grimont M, Berthet J, Tonon L, Lopez J, et al. ZEB1 transcription factor  
525 promotes immune escape in melanoma. *J Immunother Cancer*. 2022 Mar;10(3):e003484.
- 526 31. Spranger S, Dai D, Horton B, Gajewski TF. Tumor-Residing Batf3 Dendritic Cells Are Required for  
527 Effector T Cell Trafficking and Adoptive T Cell Therapy. *Cancer Cell*. 2017 May 8;31(5):711-723.e4.
- 528 32. Meiser P, Knolle MA, Hirschberger A, de Almeida GP, Bayerl F, Lacher S, et al. A distinct stimulatory  
529 cDC1 subpopulation amplifies CD8+ T cell responses in tumors for protective anti-cancer immunity.  
530 *Cancer Cell*. 2023 Aug 14;41(8):1498-1515.e10.
- 531 33. Vermi W, Bonecchi R, Facchetti F, Bianchi D, Sozzani S, Festa S, et al. Recruitment of immature  
532 plasmacytoid dendritic cells (plasmacytoid monocytes) and myeloid dendritic cells in primary  
533 cutaneous melanomas. *J Pathol*. 2003 Jun;200(2):255–68.
- 534 34. Jensen TO, Schmidt H, Møller HJ, Donskov F, Høyer M, Sjoegren P, et al. Intratumoral neutrophils  
535 and plasmacytoid dendritic cells indicate poor prognosis and are associated with pSTAT3 expression  
536 in AJCC stage I/II melanoma. *Cancer*. 2012 May 1;118(9):2476–85.
- 537 35. Movassagh M, Spatz A, Davoust J, Lebecque S, Romero P, Pittet M, et al. Selective accumulation of  
538 mature DC-Lamp+ dendritic cells in tumor sites is associated with efficient T-cell-mediated  
539 antitumor response and control of metastatic dissemination in melanoma. *Cancer Res*. 2004 Mar  
540 15;64(6):2192–8.
- 541 36. Neagu M, Constantin C, Jugulete G, Cauni V, Dubrac S, Szöllősi AG, et al. Langerhans Cells-Revising  
542 Their Role in Skin Pathologies. *J Pers Med*. 2022 Dec 15;12(12):2072.
- 543 37. Neagu M, Constantin C, Zurac S. Immune parameters in the prognosis and therapy monitoring of  
544 cutaneous melanoma patients: experience, role, and limitations. *Biomed Res Int*.  
545 2013;2013:107940.

- 546 38. Localized immune surveillance of primary melanoma in the skin deciphered through executable  
547 modeling [Internet]. [cited 2023 Oct 31]. Available from:  
548 <https://www.science.org/doi/10.1126/sciadv.add1992>
- 549 39. Oh SA, Wu DC, Cheung J, Navarro A, Xiong H, Cubas R, et al. PD-L1 expression by dendritic cells is a  
550 key regulator of T-cell immunity in cancer. *Nat Cancer*. 2020 Jul;1(7):681–91.
- 551 40. Sánchez-Paulete AR, Cueto FJ, Martínez-López M, Labiano S, Morales-Kastresana A, Rodríguez-Ruiz  
552 ME, et al. Cancer Immunotherapy with Immunomodulatory Anti-CD137 and Anti-PD-1 Monoclonal  
553 Antibodies Requires BATF3-Dependent Dendritic Cells. *Cancer Discov*. 2016 Jan;6(1):71–9.
- 554 41. Salmon H, Idoyaga J, Rahman A, Leboeuf M, Remark R, Jordan S, et al. Expansion and Activation of  
555 CD103(+) Dendritic Cell Progenitors at the Tumor Site Enhances Tumor Responses to Therapeutic  
556 PD-L1 and BRAF Inhibition. *Immunity*. 2016 Apr 19;44(4):924–38.
- 557 42. Haas L, Elewaut A, Gerard CL, Umkehrer C, Leiendecker L, Pedersen M, et al. Acquired resistance  
558 to anti-MAPK targeted therapy confers an immune-evasive tumor microenvironment and cross-  
559 resistance to immunotherapy in melanoma. *Nat Cancer*. 2021 Jul;2(7):693–708.
- 560 43. Barry KC, Hsu J, Broz ML, Cueto FJ, Binnewies M, Combes AJ, et al. A natural killer-dendritic cell axis  
561 defines checkpoint therapy-responsive tumor microenvironments. *Nat Med*. 2018 Aug;24(8):1178–  
562 91.
- 563 44. Xiao X, Guo Q, Cui C, Lin Y, Zhang L, Ding X, et al. Multiplexed imaging mass cytometry reveals  
564 distinct tumor-immune microenvironments linked to immunotherapy responses in melanoma.  
565 *Commun Med (Lond)*. 2022;2:131.
- 566 45. Crozat K, Guiton R, Contreras V, Feuillet V, Dutertre CA, Ventre E, et al. The XC chemokine receptor  
567 1 is a conserved selective marker of mammalian cells homologous to mouse CD8alpha+ dendritic  
568 cells. *J Exp Med*. 2010 Jun 7;207(6):1283–92.
- 569 46. Poulin LF, Salio M, Griessinger E, Anjos-Afonso F, Craciun L, Chen JL, et al. Characterization of  
570 human DNGR-1+ BDCA3+ leukocytes as putative equivalents of mouse CD8alpha+ dendritic cells. *J*  
571 *Exp Med*. 2010 Jun 7;207(6):1261–71.
- 572 47. Sittig SP, Bakdash G, Weiden J, Sköld AE, Tel J, Figdor CG, et al. A Comparative Study of the T Cell  
573 Stimulatory and Polarizing Capacity of Human Primary Blood Dendritic Cell Subsets. *Mediators*  
574 *Inflamm*. 2016;2016:3605643.
- 575 48. Böttcher JP, Bonavita E, Chakravarty P, Brees H, Cabeza-Cabrero M, Sammicheli S, et al. NK Cells  
576 Stimulate Recruitment of cDC1 into the Tumor Microenvironment Promoting Cancer Immune  
577 Control. *Cell*. 2018 Feb 22;172(5):1022-1037.e14.
- 578 49. Magen A, Hamon P, Fiaschi N, Soong BY, Park MD, Mattiuz R, et al. Intratumoral dendritic cell-CD4+  
579 T helper cell niches enable CD8+ T cell differentiation following PD-1 blockade in hepatocellular  
580 carcinoma. *Nat Med*. 2023 Jun;29(6):1389–99.
- 581 50. Antoranz A, Van Herck Y, Bolognesi MM, Lynch SM, Rahman A, Gallagher WM, et al. Mapping the  
582 Immune Landscape in Metastatic Melanoma Reveals Localized Cell-Cell Interactions That Predict  
583 Immunotherapy Response. *Cancer Res*. 2022 Sep 16;82(18):3275–90.
- 584 51. Liu Y, Zugazagoitia J, Ahmed FS, Henick BS, Gettinger SN, Herbst RS, et al. Immune Cell PD-L1  
585 Colocalizes with Macrophages and Is Associated with Outcome in PD-1 Pathway Blockade Therapy.  
586 *Clin Cancer Res*. 2020 Feb 15;26(4):970–7.



- 587 52. Qian J, Wang C, Wang B, Yang J, Wang Y, Luo F, et al. The IFN- $\gamma$ /PD-L1 axis between T cells and  
588 tumor microenvironment: hints for glioma anti-PD-1/PD-L1 therapy. *J Neuroinflammation*. 2018 Oct  
589 17;15(1):290.
- 590 53. Faget J, Bendriss-Vermare N, Gobert M, Durand I, Olive D, Biota C, et al. ICOS-ligand expression on  
591 plasmacytoid dendritic cells supports breast cancer progression by promoting the accumulation of  
592 immunosuppressive CD4+ T cells. *Cancer Res*. 2012 Dec 1;72(23):6130–41.
- 593 54. Kießler M, Plesca I, Sommer U, Wehner R, Wilczkowski F, Müller L, et al. Tumor-infiltrating  
594 plasmacytoid dendritic cells are associated with survival in human colon cancer. *J Immunother*  
595 *Cancer*. 2021 Mar;9(3):e001813.
- 596 55. Goc J, Germain C, Vo-Bourgais TKD, Lupo A, Klein C, Knockaert S, et al. Dendritic cells in tumor-  
597 associated tertiary lymphoid structures signal a Th1 cytotoxic immune contexture and license the  
598 positive prognostic value of infiltrating CD8+ T cells. *Cancer Res*. 2014 Feb 1;74(3):705–15.
- 599 56. Helmink BA, Reddy SM, Gao J, Zhang S, Basar R, Thakur R, et al. B cells and tertiary lymphoid  
600 structures promote immunotherapy response. *Nature*. 2020 Jan;577(7791):549–55.
- 601 57. Brewitz A, Eickhoff S, Dähling S, Quast T, Bedoui S, Kroczeck RA, et al. CD8+ T Cells Orchestrate pDC-  
602 XCR1+ Dendritic Cell Spatial and Functional Cooperativity to Optimize Priming. *Immunity*. 2017 Feb  
603 21;46(2):205–19.
- 604 58. Lou Y, Liu C, Kim GJ, Liu YJ, Hwu P, Wang G. Plasmacytoid dendritic cells synergize with myeloid  
605 dendritic cells in the induction of antigen-specific antitumor immune responses. *Journal of*  
606 *Immunology*. 2007 Feb 1;178(3):1534–41.
- 607 59. Becht E, Giraldo NA, Lacroix L, Buttard B, Elarouci N, Petitprez F, et al. Estimating the population  
608 abundance of tissue-infiltrating immune and stromal cell populations using gene expression.  
609 *Genome Biology*. 2016 Oct 20;17(1):218.

610

## 611 **Figures Legend:**

612 **Figure 1: Study design and description of the MELPREDICT cohort**

613

614 **Figure 2: Four DC subsets can be visualized simultaneously in human melanoma by *in situ* multi-**  
615 **immunofluorescence.**

616 (A) Representative example of a melanoma sample stained by a multi-IF panel including CD8 (CD8 T  
617 cells), BDCA2 (pDCs), XCR1 (cDC1), DC-LAMP (mature DCs), CD1a (LCs) and SOX10 (tumor cells).

618 (B) Cell densities in all patients. Each row represents a sample. Left panel represents densities of total  
619 DC, CD8 T cells and cells annotated as “Other” (all other cells). Right panel represents DC subset  
620 densities.

621 (C) Median of cell proportions in the whole cohort for cells annotated as DC (all subsets), CD8 T cells  
622 and “Other”.

623 (D) Boxplot of cell densities of all DC subsets in the whole cohort.

624

625 **Figure 3: While cDC1 are mostly isolated, mature DC and pDC organize into homotypic aggregates.**

626 (A) Nearest Neighbors analysis giving the median minimal distance between DCs belonging to the same  
627 subset.

628 (B) Example of pDC (green) and mature DC (light blue) homotypic aggregates identified with the SPIAT  
629 R package in a melanoma sample. Colored lines described the distance between aggregates of the  
630 same type calculated with the Scypy Python package.

631 (C) Median areas of mature DC and pDC aggregates in the whole cohort calculated with the Scypy  
632 Python package.

- 633 (D) Median distance between matures DC and pDC aggregates in the whole cohort calculated with the  
634 Scypy Python package. Group comparison performed by the Mann-Whitney test. \* p value  $\leq 0.05$ ;  
635 \*\* p value  $\leq 0.01$ ; \*\*\*p value  $\leq 0.001$ .  
636  
637  
638

639 **Figure 4. Four patterns of heterotypic DC ecosystems can be defined in melanoma.**

- 640 (A) Proportion of aggregated / isolated cell for each DC subset.  
641 (B) Unsupervised hierarchical clustering of DC aggregates according to their DC-composition (% of pDC,  
642 cDC1 and mature DC). Scale represents the Z score.  
643 (C) Proportion of each DC subsets within the 4 patterns of DC ecosystems.  
644 (D) Example of 3 defined DC ecosystems generated with SPIAT and visualized on multi-IF image (top  
645 panel) or annotated on 2D reconstitution (bottom panel).  
646 (E) DSP analysis made on homotypic pDC aggregates (n=13 ROIs), and heterotypic pDC aggregates  
647 (with matDC n=22 ROIs and with cDC1 n = 23 ROIs).  
648  
649

650 **Figure 5: DC subsets and their spatial organization are associated to the ICI response.**

- 651 (A) Comparison of cDC1, pDC and mature DC densities between responder (n=12 patients) and not  
652 responders (n=19 patients).  
653 (B) Comparison of DC aggregate number in responder and non-responder patients.  
654 (C) Nearest Neighbors analysis measuring the median minimal distance between pDC in responder and  
655 not responders.  
656 (D) Nearest Neighbors analysis measuring the median minimal distance between mature DC in  
657 responder and not responders.  
658 (E) Nearest Neighbors analysis measuring the median minimal distance between cDC1 in responder  
659 and not responders.  
660 (F) Bubble plot illustrating the p-value referring to the comparison between responders and not  
661 responders for the median minimal distance among cells annotated in the same DC subset. Group  
662 comparison performed by the Mann-Whitney test. \* p value  $\leq 0.05$ ; \*\* p value  $\leq 0.01$ ; \*\*\*p value  
663  $\leq 0.001$ .  
664  
665

666 **Figure 6 : cDC1 spatial organization with CD8 T cell is associated with the response to ICI.**

- 667 (A) Comparison of CD8 T cells density between responders and not responders.  
668 (B) CD8 T cell signature score in responder and not responders obtained with MCP-counter using RNA-  
669 seq expression data.  
670 (C) Comparison of the median distance separating CD8 T cells in responders and non responders using  
671 a kNN analysis.  
672 (D) Example of the cell network created by the Delaunay triangulation from the spatial coordinates of  
673 annotated cells on a melanoma sample. Outlier links  $> 200 \mu\text{m}$  were filtered out.  
674 (E) Ratio between the number of connections between DC /CD8 T cells and the total number of DC  
675 calculated by the Delaunay triangulation on the whole cohort in responder and non-responders.  
676 (F) Spearman correlation between annotated cells densities in the whole cohort. "r" correlation  
677 coefficient are reported in the bubbles.  
678 (G) Median minimal distance separating CD8 T cells from cDC1, pDC and mature DC, generated by  
679 nearest neighbors analysis performed with DC as reference cells.  
680 (H) Comparison of the median minimal distance separating CD8 T cells from cDC1 between responders  
681 and non responders, generated by nearest neighbors analysis performed with cDC1 as reference  
682 cells.  
683 (I) Bubble plot illustrating the p value of the median distance between nearest neighbors considering  
684 DC subsets as reference and CD8 T cells as neighbors, compared between responders and not  
685 responders. Group comparison performed by the Mann-Whitney test. \* p value  $\leq 0.05$ ; \*\* p value  
686  $\leq 0.01$ ; \*\*\*p value  $\leq 0.001$ .  
687 (J) Ratio between the number of connection cDC1- CD8 T cells and the total number of cDC1 calculated  
688 by the Delaunay triangulation on the whole cohort in responder and not responders.  
689  
690

691 **Supp Fig 1: Work flow analysis for the multiplexed immunofluorescence staining**

- 692 (A) Image analysis workflow performed using Inform©. Tissue segmentation (1) was trained to split  
 693 up tissue (tumor and stroma) from empty/artefact zones. Cell segmentation (2) was trained to  
 694 detect nuclei. Cell phenotyping (3) was trained to identify all distinct phenotypes of interest based  
 695 on staining intensities and shape of cells. Results were plotted on the spectral mixed image as  
 696 dots: pDCs (red), cDC1 (green), LCs (orange), mature DCs (yellow) and CD8 T cells (cyan blue). The  
 697 phenotype named "Other" (blue) included all other immune and non-immune populations.  
 698 (B) Specific marker expression in each annotated populations.  
 699 (C) Median tissue area analyzed in the whole cohort by the multiplex immunofluorescent panel.  
 700 (D) Comparison between the multi-IF image (left panel) and the 2D projection of cells using their XY  
 701 coordinates and phenotype (right panel).  
 702 (E) Median of DC subsets proportions among all tumor-associated DCs  
 703  
 704

705 **Supp. Fig. 2.** Composition of DC aggregates  
 706  
 707  
 708  
 709

710 **Supp Table 1 : Clinical features of MELPREDICT patients at baseline prior immunotherapy onset**  
 711

| MELPREDICT cohort |                     |                |                  |                     | Test Chi-square:       |         |
|-------------------|---------------------|----------------|------------------|---------------------|------------------------|---------|
| Clinical feature  |                     | Total (n= 41)  | Analyzed (n =31) | Responders (n = 12) | Not-Responders (n =19) | P value |
| Gender            | Men                 | 24 (59)        | 18 (58)          | 6 (50)              | 12 (63)                | .4695   |
|                   | Women               | 17 (41)        | 13 (42)          | 6 (50)              | 7 (37)                 |         |
| Age at first line | Median              | 62 y/o (25-86) | 64 y/o (35-86)   | 64 y/o              | 63 y/o                 | .4220   |
| Site of biopsy    | Primary             | 20 (49)        | 14 (45)          | 5 (42)              | 9 (47)                 | .7560   |
|                   | Metastasis          | 21 (51)        | 17 (55)          | 7 (58)              | 10 (53)                |         |
| BRAF Status       | WT                  | 27 (66)        | 20 (65)          | 8 (67)              | 12 (63)                | .5920   |
|                   | V600E               | 13 (32)        | 10 (32)          | 3 (25)              | 7 (37)                 |         |
| Brain metastasis  | Yes                 | 8 (20)         | 6 (19)           | 1 (8)               | 5 (26)                 | .2170   |
|                   | No                  | 33 (80)        | 25 (81)          | 11 (92)             | 14 (74)                |         |
| First line ICP    | Anti-PD1            | 26 (63)        | 21 (68)          | 7 (58)              | 14 (74)                | .3731   |
|                   | Anti-PD1/anti-CTLA4 | 15 (37)        | 10 (32)          | 5 (42)              | 5 (26)                 |         |

726 **Supp Table 2 : Mann-Whitney test p-values on immune cell density depending on various clinical parameters in the MELPREDICT cohort**  
 727

| Clinical feature                                 | CD8   | cDC1  | Mature DC | pDC   |
|--------------------------------------------------|-------|-------|-----------|-------|
| Gender (M vs F)                                  | 0.594 | 0.921 | 0.767     | 0.567 |
| Site of biopsy (Primary vs MTS)                  | 0.984 | 0.576 | 0.118     | 0.922 |
| BRAF status (Muté vs WT)                         | 0.474 | 0.948 | 0.649     | 0.100 |
| Brain MTS (Yes vs No)                            | 0.952 | 0.751 | 0.981     | 0.643 |
| First line ICP (Anti-PD1 vs antiPD1 + antiCTLA4) | 0.789 | 0.010 | 0.983     | 0.392 |

739  
 740

741 **Sup Table 3: Optimized immunofluorescence staining conditions for the multiplex**  
742 **immunofluorescence panel**

| Marker : | Antibody Dilution | Antibody Retrieval | Antibody Incubation | Secondary Antibody             |
|----------|-------------------|--------------------|---------------------|--------------------------------|
| DC-Lamp  | 1:100             | ER2 - 20 min       | 30 min              | Anti-Rat IgG-HRP Conjugated    |
| BDCA2    | 1:40              | ER2 - 20 min       | 30 min              | Anti-Goat IgG-HRP Conjugated   |
| CD8      | 1:40              | ER2 - 20 min       | 30 min              | Opal Polymer HRP Ms + Rb       |
| CD1a     | 1:50              | ER2 - 20 min       | 30 min              | Opal Polymer HRP Ms + Rb       |
| XCR1     | 1:50              | ER2 - 20 min       | 30 min              | Anti-Rabbit IgG-HRP Conjugated |
| SOX10    | 1:1000            | ER2 - 20 min       | 30 min              | Opal Polymer HRP Ms + Rb       |

743

| MELPREDICT cohort - n = 41 melanoma patients |                      |                    |
|----------------------------------------------|----------------------|--------------------|
| Clinical feature                             |                      | n (%)              |
| Gender                                       | Men                  | 24 (59)            |
|                                              | Women                | 17 (41)            |
| Age at 1st line                              | Median               | 62 y/o (25-86 y/o) |
| Site of biopsy                               | Primary              | 20 (49)            |
|                                              | Metastasis           | 21 (51)            |
| BRAF status                                  | WT                   | 27 (66)            |
|                                              | V600E                | 13 (32)            |
| Brain metastasis                             | yes                  | 8 (20)             |
|                                              | no                   | 33 (80)            |
| 1st line ICP                                 | anti-PD-1            | 26 (63)            |
|                                              | + anti-CTLA-4        | 15 (37)            |
| Response to ICP                              | Responders           | 15 (37)            |
|                                              | PFS $\geq$ 12 months |                    |
|                                              | Not responders       | 26 (63)            |
|                                              | PFS $\leq$ 12 months |                    |

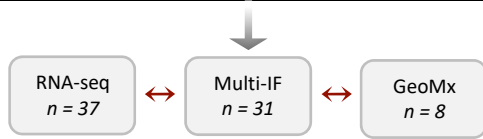

**Figure 1: Study design and description of the MELPREDICT cohort**



## Supp. Figure 1

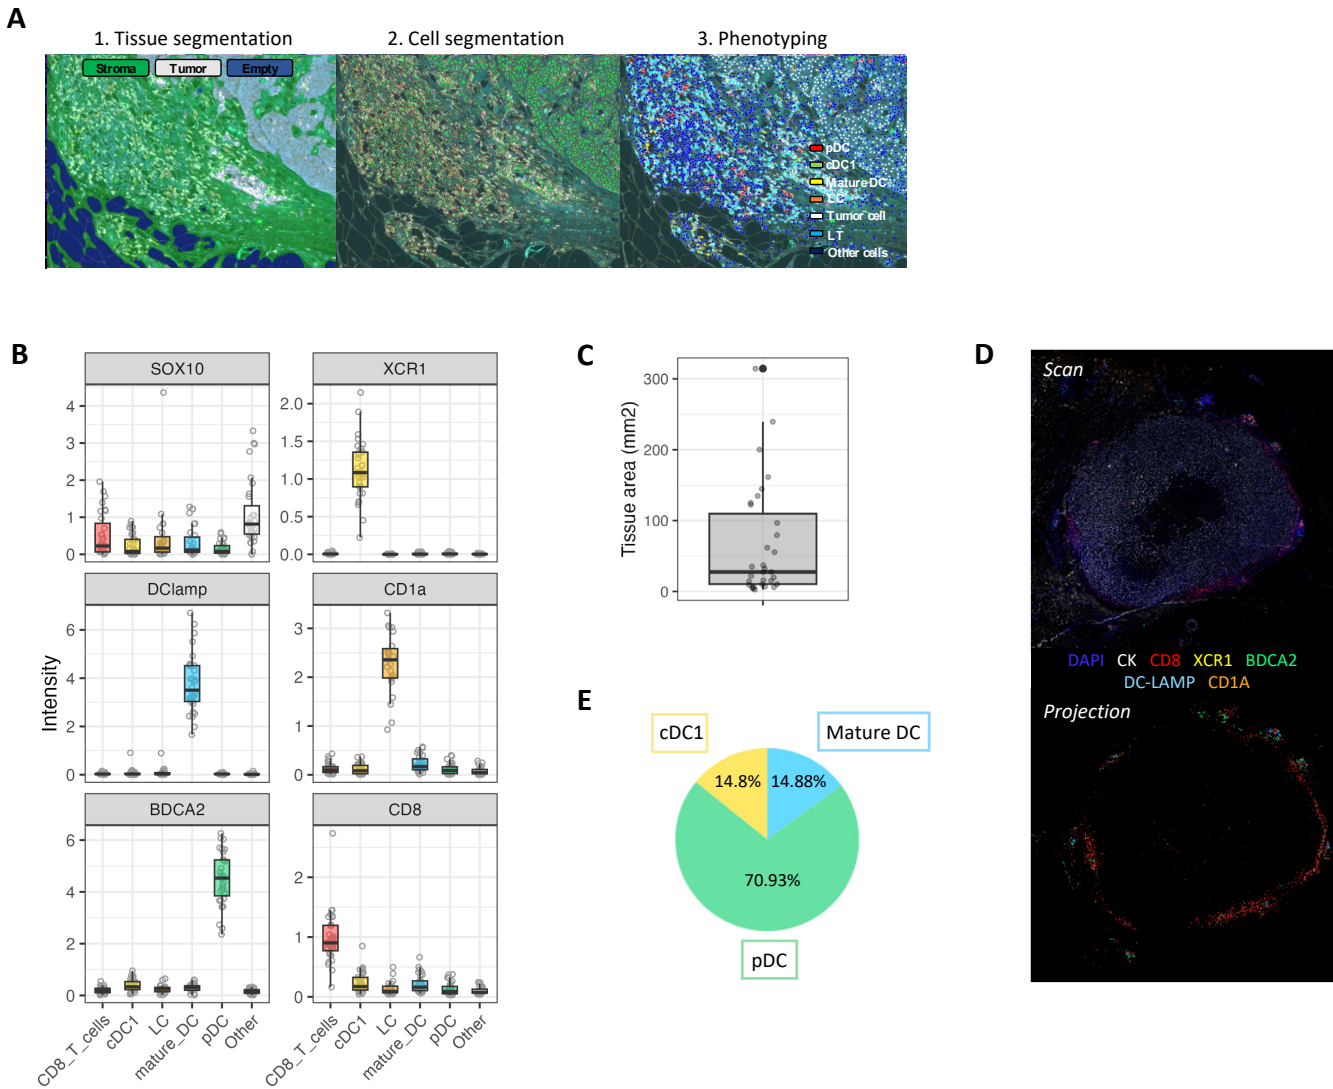

### Supp Fig 1: Work flow analysis for the multiplexed immunofluorescence staining

- (A) Image analysis workflow performed using Inform©. Tissue segmentation (1) was trained to split up tissue (tumor and stroma) from empty/artefact zones. Cell segmentation (2) was trained to detect nuclei. Cell phenotyping (3) was trained to identify all distinct phenotypes of interest based on staining intensities and shape of cells. Results were plotted on the spectral mixed image as dots: pDCs (red), cDC1 (green), LCs (orange), mature DCs (yellow) and CD8 T cells (cyan blue). The phenotype named "Other" (blue) included all other immune and non-immune populations.
- (B) Specific marker expression in each annotated populations.
- (C) Median tissue area analyzed in the whole cohort by the multiplex immunofluorescent panel.
- (D) Comparison between the multi-IF image (left panel) and the 2D projection of cells using their XY coordinates and phenotype (right panel).
- (E) Median of DC subsets proportions among all tumor-associated DCs

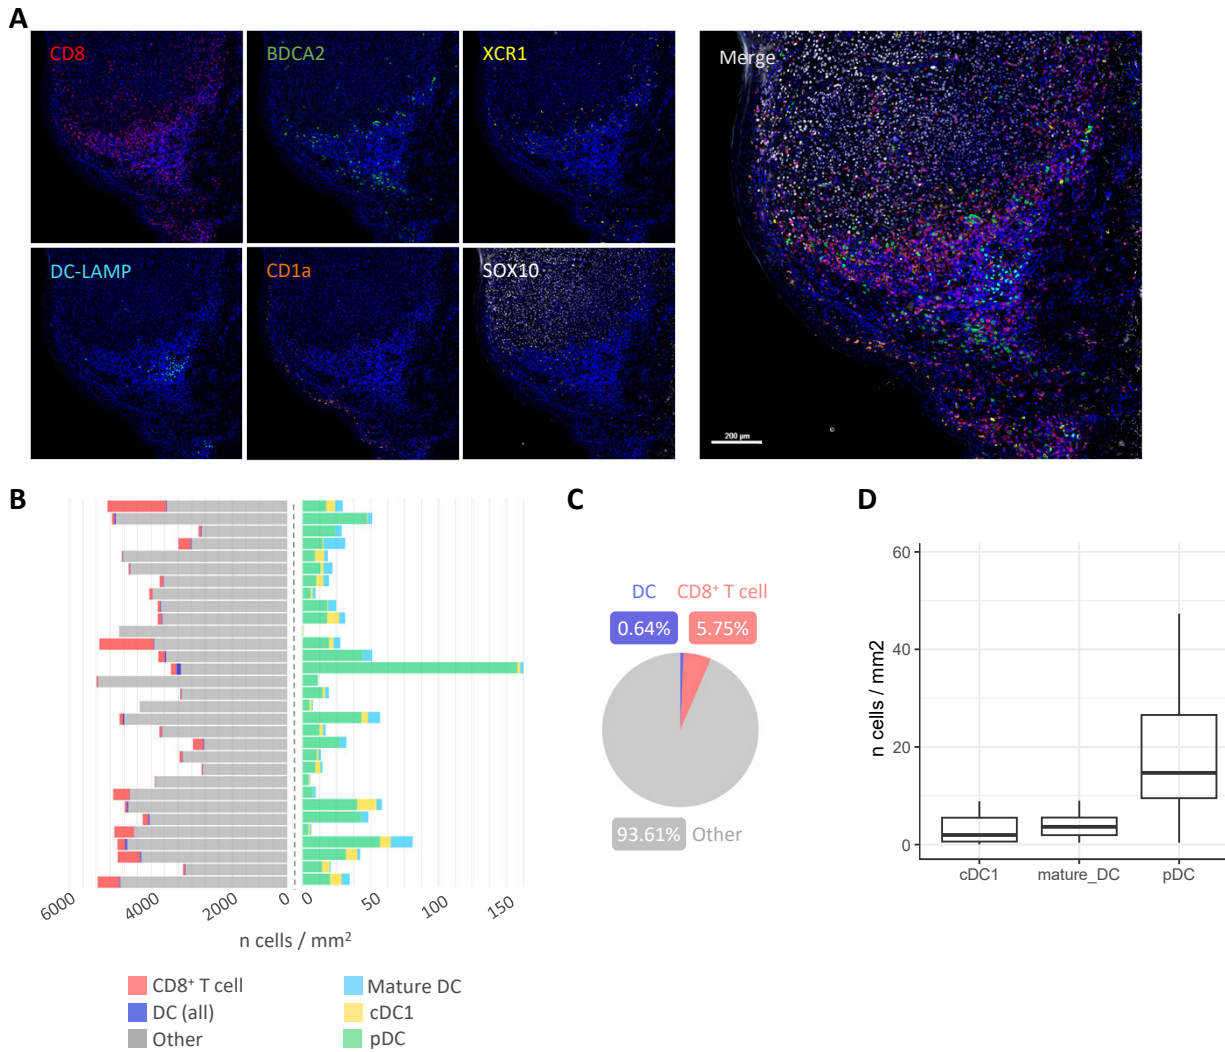

**Figure 2: Four DC subsets can be visualized simultaneously in human melanoma by *in situ* multi-immunofluorescence.**

- (A) Representative example of a melanoma sample stained by a multi-IF panel including CD8 (CD8 T cells), BDCA2 (pDCs), XCR1 (cDC1), DC-LAMP (mature DCs), CD1a (LCs) and SOX10 (tumor cells).
- (B) Cell densities in all patients. Each row represents a sample. Left panel represents densities of total DC, CD8 T cells and cells annotated as “Other” (all other cells). Right panel represents DC subset densities.
- (C) Median of cell proportions in the whole cohort for cells annotated as DC (all subsets), CD8 T cells and “Other”.
- (D) Boxplot of cell densities of all DC subsets in the whole cohort.

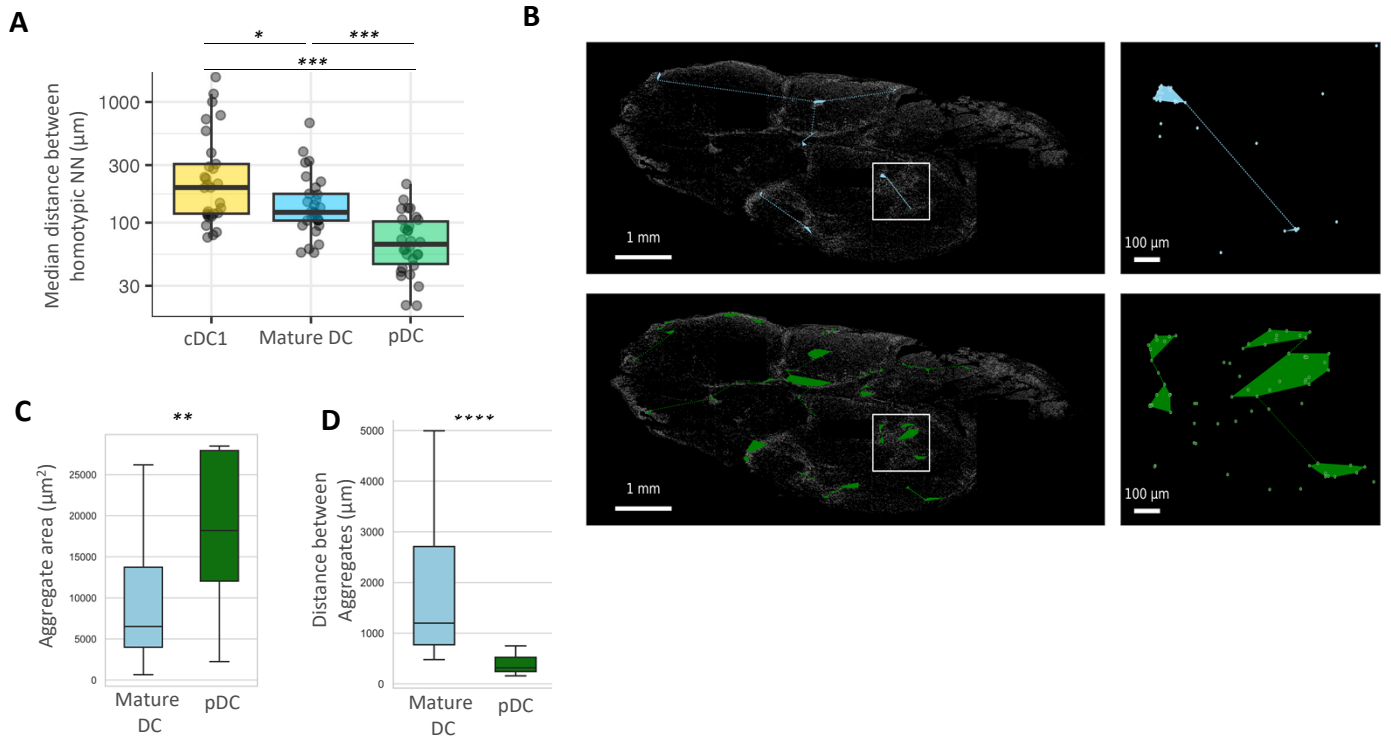

**Figure 3: While cDC1 are mostly isolated, mature DC and pDC organize into homotypic aggregates.**

- (A) Nearest Neighbors analysis giving the median minimal distance between DCs belonging to the same subset.
- (B) Example of pDC (green) and mature DC (light blue) homotypic aggregates identified with the SPIAT R package in a melanoma sample. Colored lines described the distance between aggregates of the same type calculated with the Scipy Python package.
- (C) Median areas of mature DC and pDC aggregates in the whole cohort calculated with the Scipy Python package.
- (D) Median distance between matures DC and pDC aggregates in the whole cohort calculated with the Scipy Python package. Group comparison performed by the Mann-Whitney test. \* p value  $\leq 0.05$ ; \*\* p value  $\leq 0.01$ ; \*\*\*p value  $\leq 0.001$ .

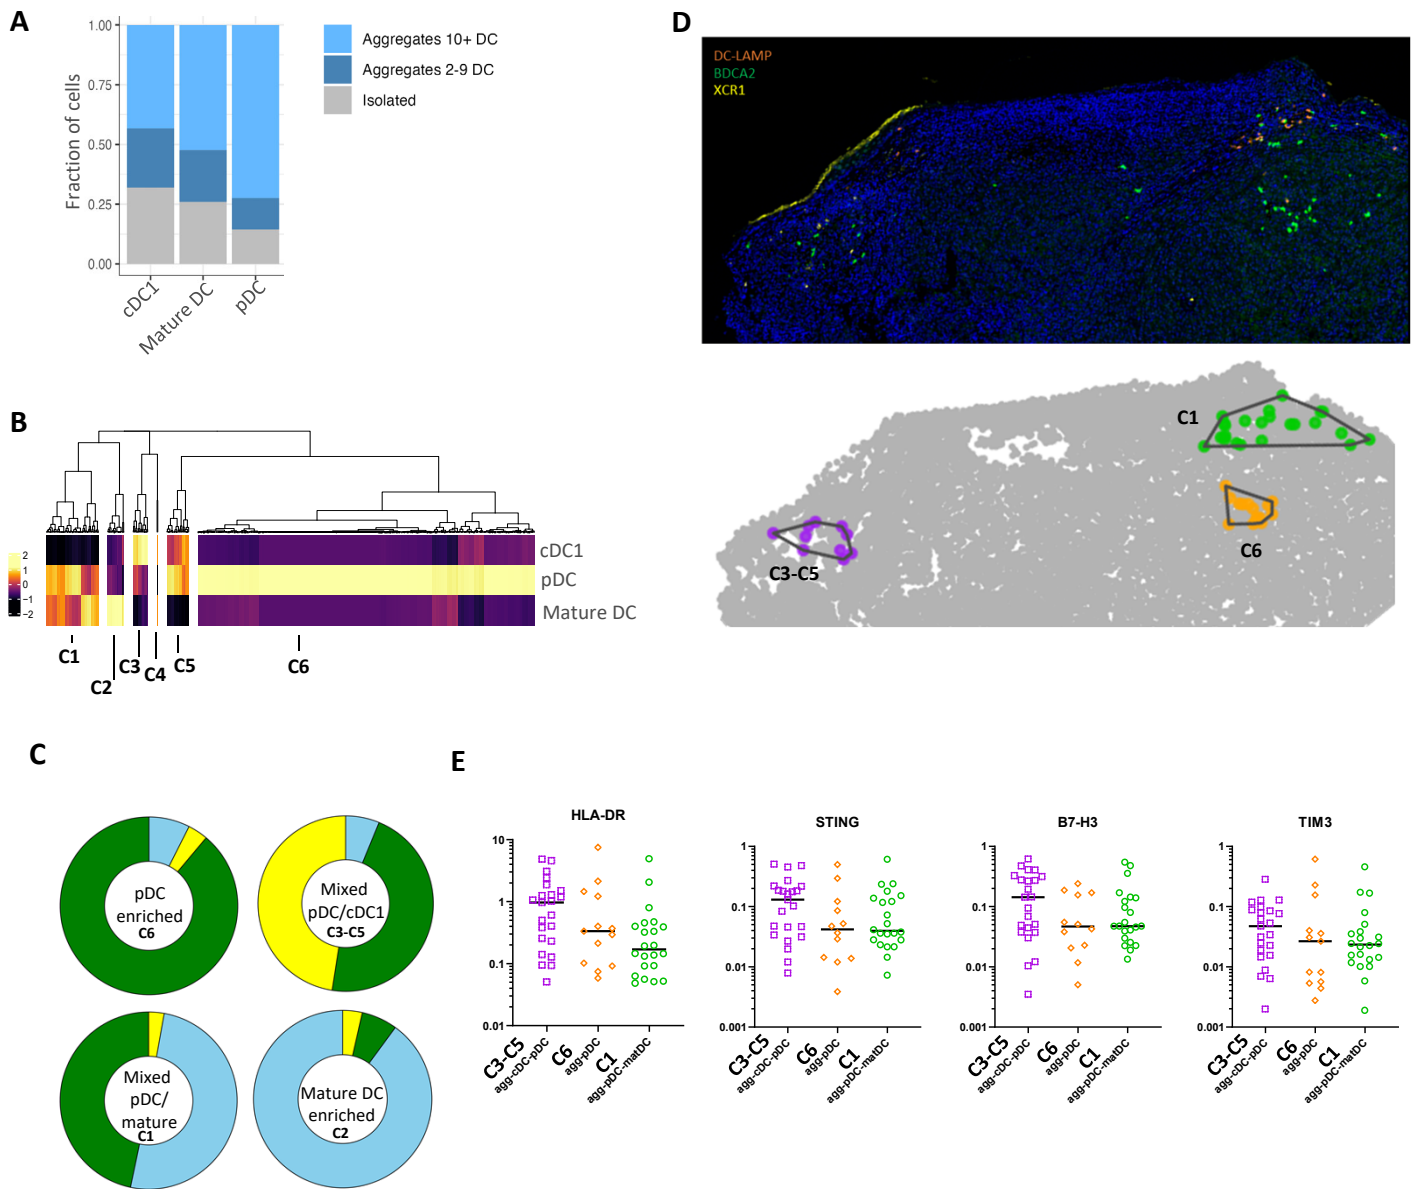

**Figure 4. Four patterns of heterotypic DC ecosystems can be defined in melanoma.**

- (A) Proportion of aggregated / isolated cell for each DC subset.
- (B) Unsupervised hierarchical clustering of DC aggregates according to their DC-composition (% of pDC, cDC1 and mature DC). Scale represents the Z score.
- (C) Proportion of each DC subsets within the 4 patterns of DC ecosystems.
- (D) Example of 3 defined DC ecosystems generated with SPIAT and visualized on multi-IF image (top panel) or annotated on 2D reconstitution (bottom panel).
- (E) DSP analysis made on homotypic pDC aggregates (n=13 ROIs), and heterotypic pDC aggregates (with matDC n=22 ROIs and with cDC1 n = 23 ROIs).

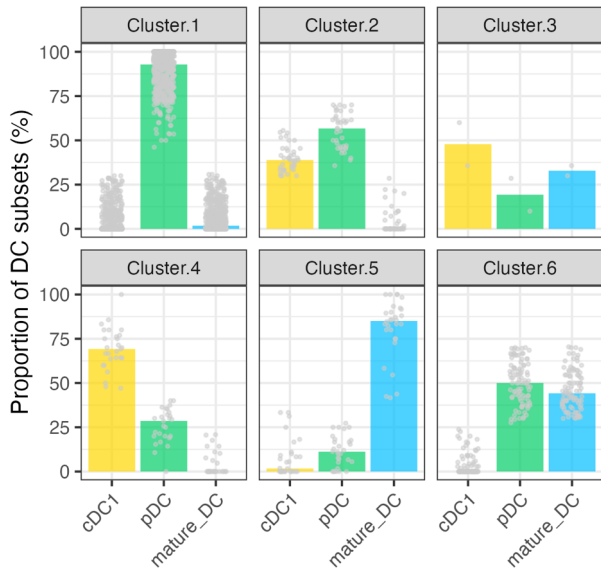

**Supp. Fig. 2.** Composition of DC aggregates



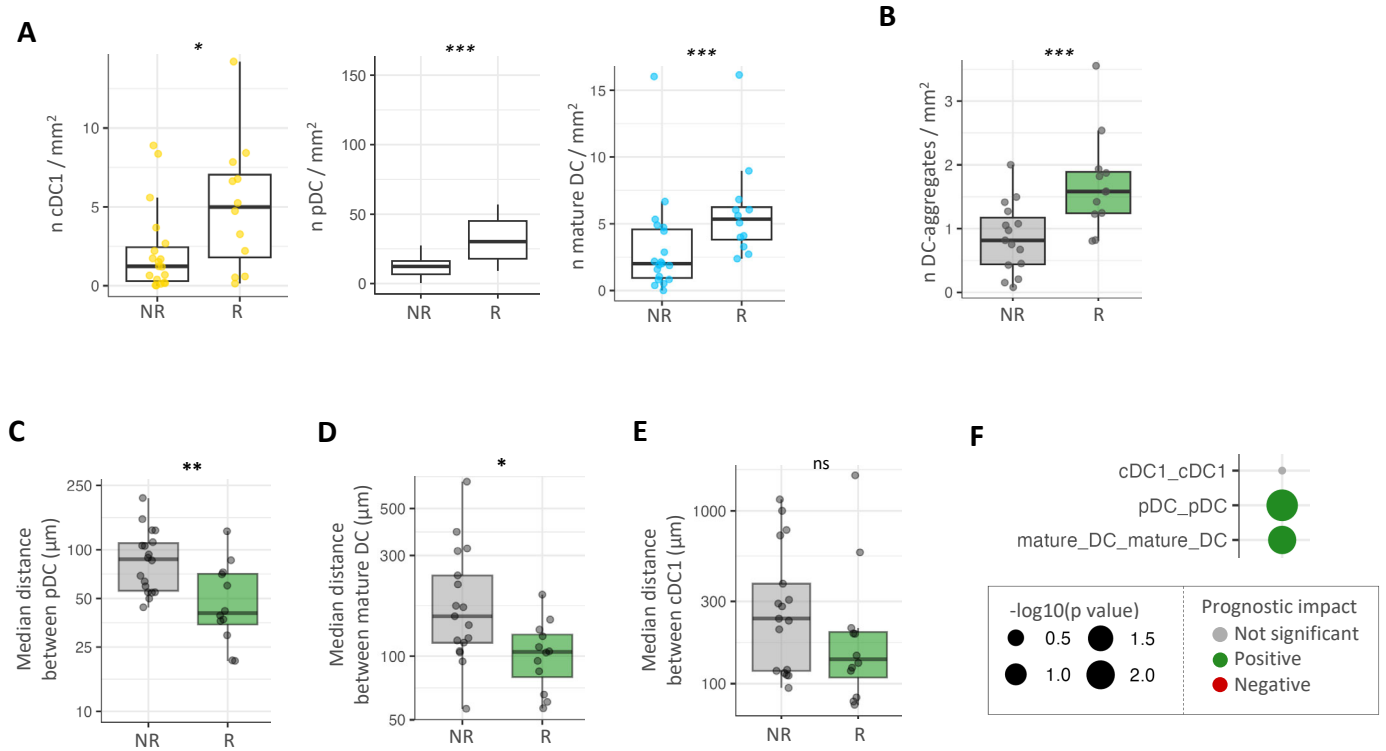

**Figure 5: DC subsets and their spatial organization are associated to the ICI response.**

- (A) Comparison of cDC1, pDC and mature DC densities between responder (n=12 patients) and not responders (n=19 patients).
- (B) Comparison of DC aggregate number in responder and non-responder patients.
- (C) Nearest Neighbors analysis measuring the median minimal distance between pDC in responder and not responders.
- (D) Nearest Neighbors analysis measuring the median minimal distance between mature DC in responder and not responders.
- (E) Nearest Neighbors analysis measuring the median minimal distance between cDC1 in responder and not responders.
- (F) Bubble plot illustrating the p-value referring to the comparison between responders and not responders for the median minimal distance among cells annotated in the same DC subset. Group comparison performed by the Mann-Whitney test. \* p value ≤ 0.05; \*\* p value ≤ 0.01; \*\*\* p value ≤ 0.001.

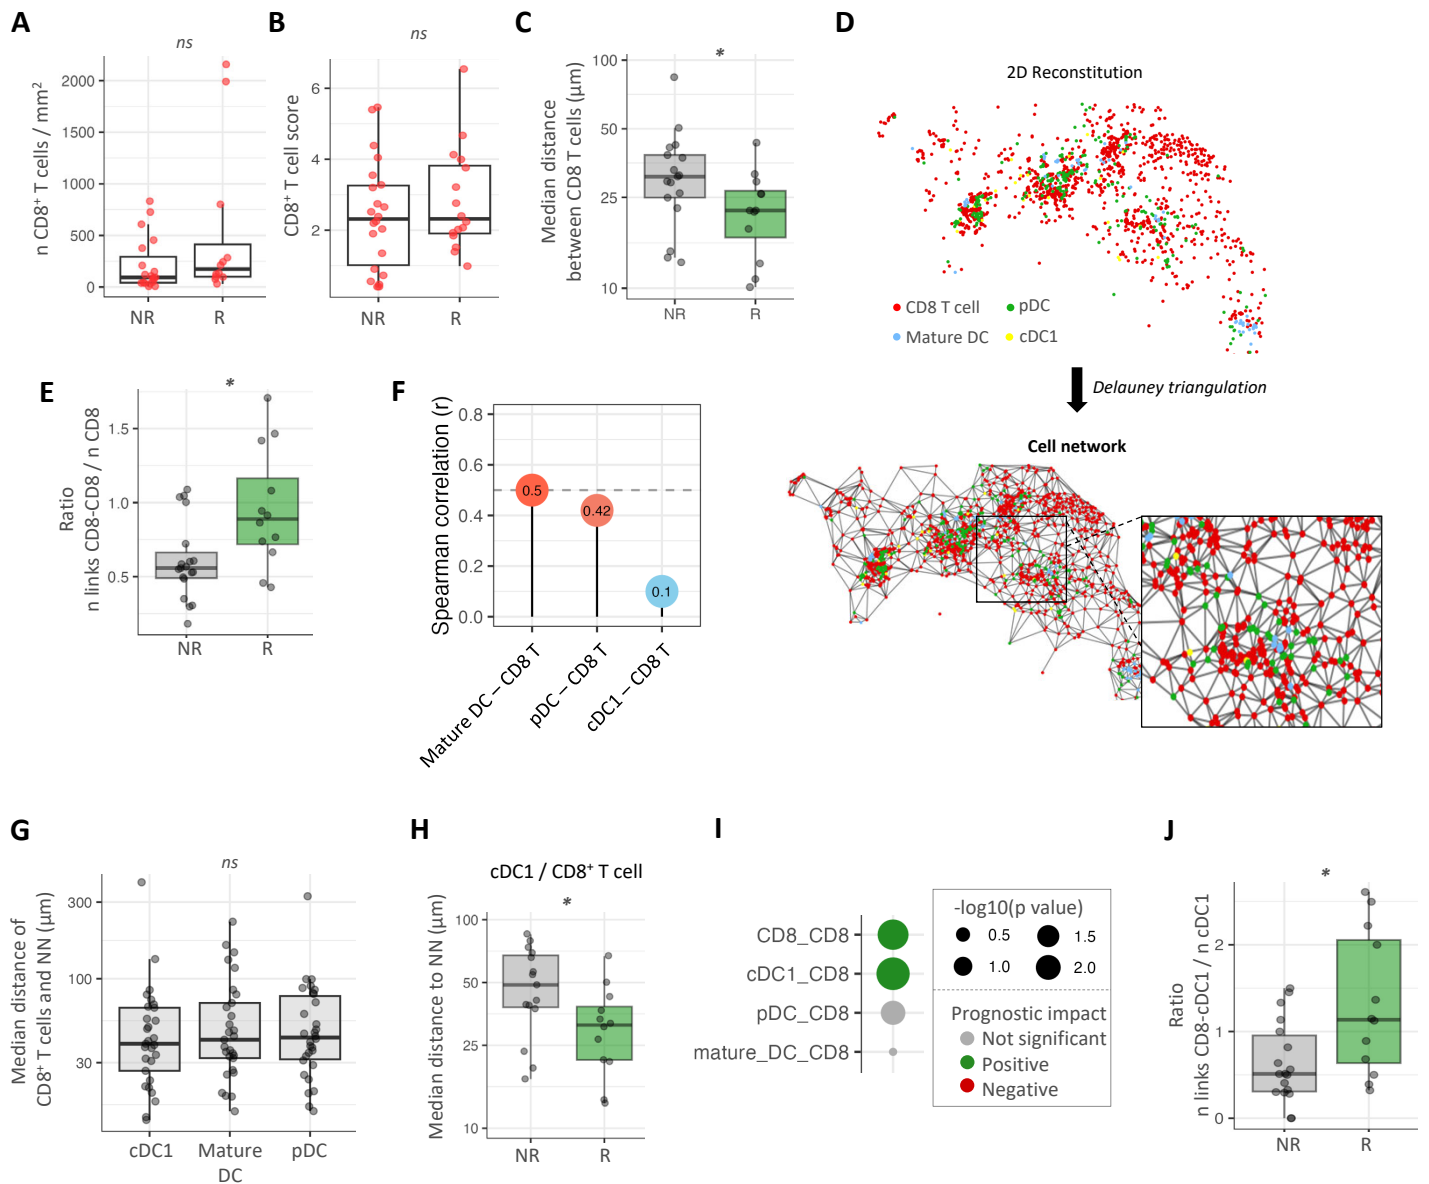

**Figure 6 : cDC1 spatial organization with CD8 T cell is associated with the response to ICI.**

- (A) Comparison of CD8 T cells density between responders and not responders.
- (B) CD8 T cell signature score in responder and not responders obtained with MCP-counter using RNA-seq expression data.
- (C) Comparison of the median distance separating CD8 T cells in responders and non responders using a kNN analysis.
- (D) Example of the cell network created by the Delaunay triangulation from the spatial coordinates of annotated cells on a melanoma sample. Outlier links > 200 μm were filtered out.
- (E) Ratio between the number of connections between DC /CD8 T cells and the total number of DC calculated by the Delaunay triangulation on the whole cohort in responder and non-responders.
- (F) Spearman correlation between annotated cells densities in the whole cohort. “r” correlation coefficient are reported in the bubbles.
- (G) Median minimal distance separating CD8 T cells from cDC1, pDC and mature DC, generated by nearest neighbors analysis performed with DC as reference cells.
- (H) Comparison of the median minimal distance separating CD8 T cells from cDC1 between responders and non responders, generated by nearest neighbors analysis performed with cDC1 as reference cells.
- (I) Bubble plot illustrating the p value of the median distance between nearest neighbors considering DC subsets as reference and CD8 T cells as neighbors, compared between responders and non responders. Group comparison performed by the Mann-Whitney test. \* p value ≤ 0.05; \*\* p value ≤ 0.01; \*\*\*p value ≤ 0.001.
- (J) Ratio between the number of connection cDC1- CD8 T cells and the total number of cDC1 calculated by the Delaunay triangulation on the whole cohort in responder and not responders.
